# Supplementary material for: Detection of EGFR and KRAS Mutation by Pyrosequencing Analysis in Cytologic Samples of Non-Small Cell Lung Cancer
Source: PubMed Central journal article supplement — J Korean Med Sci. 2016 May 12;31(8):1224–30. doi: 10.3346/jkms.2016.31.8.1224 (PMC4951551; doi:10.3346/jkms.2016.31.8.1224), 2016-05-12
Supplement: jkms-31-1224-s001.pdf [file jkms-31-1224-s001.pdf]

**Supplementary Table 1.** Profiles of *EGFR* and *KRAS* mutation in the type of specimens (n = 119 [*EGFR*], n = 28 [*KRAS*])

| Mutation sites               |                                  | Cytology   | Biopsy     | Resection  | Total      |
|------------------------------|----------------------------------|------------|------------|------------|------------|
| <i>EGFR</i> mutation profile |                                  |            |            |            |            |
| <i>EGFR</i> Exon 18          | G719A                            |            | 2          |            | 2          |
| <i>EGFR</i> Exon 19          | E746_A750                        | 13         | 25         | 10         | 48         |
|                              | E746_P751insA                    |            | 1          |            | 1          |
|                              | E747_P753insP                    | 1          | 1          |            | 2          |
|                              | E747_P753insS                    |            | 2          |            | 2          |
|                              | E747_A753insS                    |            |            | 1          | 1          |
|                              | L747_P751insA                    | 1          | 6          |            | 7          |
|                              | L747_P753insS                    | 1          | 6          | 4          | 11         |
|                              | del E746_S752insV                | 1          |            |            | 1          |
|                              | L747_T751insP                    | 2          |            |            | 2          |
|                              | 2239 T → C heterologous mutation | 1          | 1          |            | 2          |
| <i>EGFR</i> Exon 20          | T790M                            |            | 1          |            | 1          |
| <i>EGFR</i> Exon 21          | A859T                            | 2          | 2          |            | 4          |
|                              | L858R                            | 10         | 19         | 6          | 35         |
| Total                        |                                  | 32 (26.89) | 66 (55.46) | 21 (17.65) | 119 (100%) |
| <i>KRAS</i> mutation profile |                                  |            |            |            |            |
| Codon 12                     | G12A                             |            | 1          |            | 1          |
|                              | G12C                             |            | 3          |            | 3          |
|                              | G12D                             | 2          | 4          | 2          | 8          |
|                              | G12V                             |            | 6          |            | 6          |
| Codon 13                     | G13D                             | 1          | 2          |            | 3          |
| Codon 61                     | Q61H                             | 1          | 5          |            | 6          |
|                              | Q61L                             |            | 1          |            | 1          |
| Total                        |                                  | 4 (14.28)  | 22 (78.57) | 2 (7.23)   | 28 (100%)  |
